# Supplementary material
Source: Springer Nature journal article supplement (https://www.springermedizin.de/resource/supplementary/12986_2008_153_MOESM1_ESM.pdf/25655478)
Supplement: MOESM1 [file 25655478]

## Additional file 1: List of Permitted Foods and Beverages, Serving Sizes and Recipes

| <b>Food Category</b>              | <b>Average Serving Size</b>                                                                             | <b>Daily Recommendation</b> | <b>Examples</b>                                                                                                       |
|-----------------------------------|---------------------------------------------------------------------------------------------------------|-----------------------------|-----------------------------------------------------------------------------------------------------------------------|
| Legumes                           | ½ cup                                                                                                   | At least 1 serving          | Beans, hummus, green peas                                                                                             |
| Low GI* (<55)<br>Vegetables       | ½ cup                                                                                                   | At least 3 servings         | Broccoli, celery, cabbage, spinach, mushrooms, tomatoes, sea vegetables, fresh juices made from acceptable vegetables |
| Moderate GI (55-70)<br>Vegetables | ½ cup                                                                                                   | Only 1 serving              | Beets, sweet potatoes, carrots                                                                                        |
| Concentrated Protein Sources      |                                                                                                         | Unlimited                   | Eggs, fish, poultry, tofu, low-fat cottage cheese, low-fat mozzarella                                                 |
| Fruits                            | Specific quantities for each fruit to equal 80 kcal                                                     | 2-3 servings                | Apple, blueberries, cherries, grapes, orange                                                                          |
| Nuts and Seeds                    | Approx. 1 scant handful or 2 TBSP nut butter                                                            | 1 serving                   | Peanut butter, almonds, hazelnuts, walnuts                                                                            |
| Oils                              | 1 teaspoon or as indicated                                                                              | 4 servings                  | Flaxseed oil, olive oil, ripe green olives, avocado                                                                   |
| Dairy                             | 6 oz. or as indicated                                                                                   | (Optional)                  | Plain low-fat yogurt, 1% milk, soymilk (unsweetened)                                                                  |
| Beverages                         |                                                                                                         | Unlimited                   | Decaffeinated, herbal, or green tea; decaffeinated coffee; water                                                      |
|                                   |                                                                                                         | Limited                     | 1 glass of red wine (4 oz.), 1-2 cups (8 oz.) of caffeinated coffee                                                   |
| Condiments                        |                                                                                                         | Unlimited                   | Cinnamon, mustard, soy sauce, flavored extracts                                                                       |
| Allowable sweeteners              |                                                                                                         |                             | Agave nectar, stevia                                                                                                  |
| <b>To be eliminated from diet</b> | <b>Examples</b>                                                                                         |                             |                                                                                                                       |
| Trans fatty acids                 | Partially hydrogenated vegetable oil                                                                    |                             |                                                                                                                       |
| Artificial sweeteners             | Splenda® (sucralose), NutraSweet® (aspartame)                                                           |                             |                                                                                                                       |
| High GI fruits and vegetables     | White potatoes, corn, bananas                                                                           |                             |                                                                                                                       |
| Simple sugars                     | High fructose corn syrup, fruit juice, table sugar (sucrose), evaporated cane juice, honey, maple syrup |                             |                                                                                                                       |

\*Glycemic Index
